# Supplementary material for: Isolated pores dissected from human two-pore channel 2 are functional
Source: PubMed Central journal article supplement (PMC5150636; doi:10.1038/srep38426), 2016-12-12
Supplement: srep38426-s1.pdf [file srep38426-s1.pdf]

## **Supplementary information**

**Isolated pores dissected from human two-pore channel 2 are functional.**

**Christopher J. Penny<sup>1</sup>, Taufiq Rahman<sup>2</sup>, Altin Sula<sup>3</sup>, Andrew J. Miles<sup>3</sup>, B. A. Wallace<sup>3\*</sup>  
and Sandip Patel<sup>1\*</sup>**

**<sup>1</sup>Department of Cell and Developmental Biology, University College London, London,  
WC1E 6BT, UK**

**<sup>2</sup>Department of Pharmacology, University of Cambridge, Cambridge, CB2 1PD, UK**

**<sup>3</sup>Institute of Structural and Molecular Biology, Birkbeck College, University of London,  
London, WC1E 7HX, UK**

**\*Authors to whom correspondence should be addressed.**

### **Figure S1. Optimisation of TPC2 pore-only protein expression in *E. Coli*.**

(A-C) Expression, solubilisation and purification trials of *E. coli* cells transformed with a plasmid encoding the hexa-histidine-tagged TPC2 DI pore-only construct containing an extended C-terminus (S212-Q418) (expected size: 20 kDa). (A) Western blot analysis using an  $\alpha$ -poly-histidine antibody against membrane fractions isolated from *E. coli* cells during expression trials at 37°C and 22°C. (B) Western blot analysis using an  $\alpha$ -poly-histidine antibody against membranes solubilised in 10x CMC of the detergents DM, Cymal5 and LDAO or in 1% (w/v) of DDM during solubilisation trials. (C) Coomassie-stained SDS PAGE analysis of the proteins eluted by 500 mM imidazole from washed Ni-NTA or TALON resin beads during affinity chromatography purification trials. (D) Expression trial of shortened TPC2 DI pore-only (S212-A337) (expected size: 14.6 kDa). This construct was used for all subsequent experiments.

### **Figure S2. Co-expression of TPC2 pores with a lysosomal marker**

Confocal images of HeLa cells co-expressing a lysosomal marker (LAMP1-RFP, red) and the indicated GFP-tagged pore (green). Nuclei (blue) were stained with DAPI. Scale bar 10  $\mu$ m. Colocalisation plots of red and green fluorescence intensity between arrowheads are shown below.

### **Figure S3. Homology model alignments**

Alignments of human TPC2 (HsTPC2) and TPC1 from *Arabidopsis Thaliana* (AtTPC1) used for the generation of the homology model of the DI pore. For AtTPC1, transmembrane helices are highlighted in yellow and the re-entrant pore helices are highlighted in cyan. For HsTPC2, a short turret loop, denoted by ^ was not modelled.

**Table S1. Primers**

List of forward and reverse primers used to generate the pore-only constructs. Mutagenic bases are underlined. The *E. coli* primers target a codon-optimised plasmid.

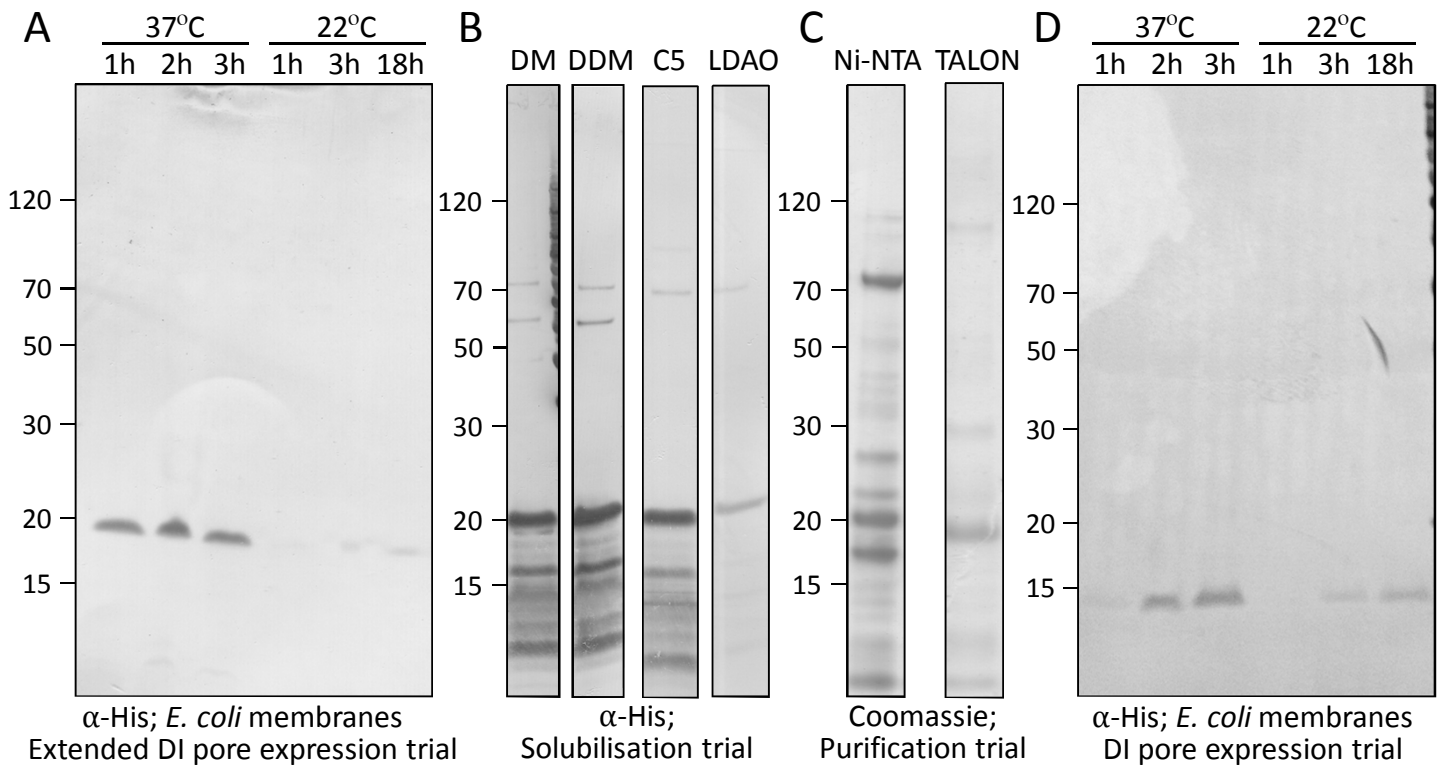

**Fig S1**

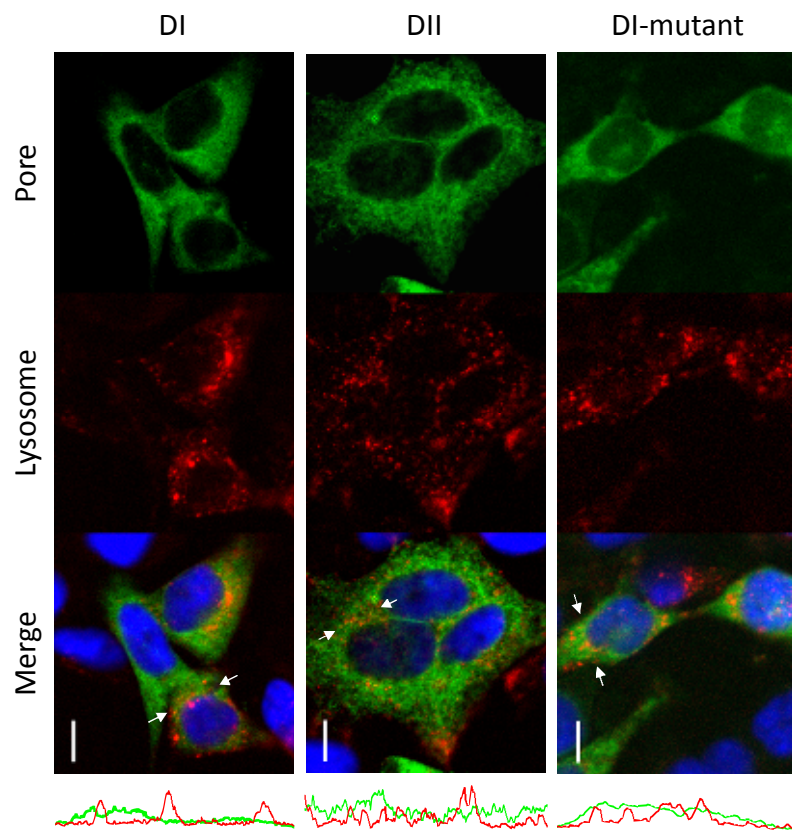

*Fig S2*

|          |                                                                                                                             |     |
|----------|-----------------------------------------------------------------------------------------------------------------------------|-----|
| HsTPC2DI | SLPEMASVGLLLAIHLCLFTMFGMLLFAGGKQD^LTYFQNLPESLTSLLVLLTTANNPDV                                                                | 277 |
|          | ::         :             :        ::             :                   :        :             :    :              :           |     |
| AtTPC1   | MLGT <del>YLNILALWMLFLLFASWIAFVMF</del> E <del>DTQQG^LTVF</del> T <del>SYGATLYQMFI</del> L <del>FTTSNNPDV</del>             | 270 |
| HsTPC2DI | MIPAYSKNRAYAIAFFIVFTVIGSLFLMNLLTAIIYSQFRGYLMKSLQTSLFRRRLGTRAA                                                               | 337 |
|          | :             ::         :    :    :    :                  :         :         :                  :              :        : |     |
| AtTPC1   | <del>WIPAYKSSRW</del> <del>SSVFFVLYVLI</del> G <del>VYFVTNLI</del> L <del>AVVYDSFKEQLAKQVSGMDQMRR</del> MLEKA               | 330 |

*Fig S3*

| <b>Cloning Primers</b>        |         |                                                   |
|-------------------------------|---------|---------------------------------------------------|
| DI pore<br>(HeLa)             | Forward | 5'-CACCGAATTCTGGATGGCCTCGCTGCCGAAATG-3'           |
|                               | Reverse | 5'-AGGCTCGAGCATGGAGGATAGGACTTCAAAGG-3'            |
| DII pore<br>(HeLa)            | Forward | 5'-CACCGAATTCTGGATGGCCCTGGTGCAGAACATGCGT-3'       |
|                               | Reverse | 5'-AGGCTCGAGCCTGCACAGCCACAGGTG-3'                 |
| <b>Mutagenic Primers</b>      |         |                                                   |
| DI-mutant<br>(HeLa)           | Forward | 5'-GTCTCTGACTTCCC <u>C</u> CCTGGTGCTGCTGA-3'      |
|                               | Reverse | 5'-TCAGCAGCACCAGGG <u>G</u> GGAAGTCAGAGAC-3'      |
| DI pore<br>( <i>E. Coli</i> ) | Forward | 5'-GTACTCGCGCAGCCTA <u>G</u> GAGGTTTGCCTTGTG-3'   |
|                               | Reverse | 5'-CACAAAGCGCAAACCTC <u>C</u> TAGGCTGCGCGAGTAC-3' |

*Table S1*
